# Supplementary material
Source: PubMed Central journal article supplement (PMC8160503)
Supplement: 10.1182-2020010150_bloodbld2020010150-suppl1.pdf [file 10.1182-2020010150_bloodbld2020010150-suppl1.pdf]

## Supplementary Appendix

### Clonal hematopoiesis and therapy-related myeloid neoplasms following neuroblastoma treatment

Tim H.H. Coorens\*<sup>1</sup>, Grace Collord\*<sup>1,2,3</sup>, Wanhua Lu<sup>4</sup>, Emily Mitchell<sup>1,4,5</sup>, Jannat Ijaz<sup>1</sup>, Thomas Roberts<sup>4</sup>, Thomas R.W. Oliver<sup>1</sup>, G.A. Amos Burke<sup>4</sup>, Michael Gattens<sup>4</sup>, Emmy Dickens<sup>4</sup>, Jyoti Nangalia<sup>1,4,5,6</sup>, Marc Tischkowitz<sup>7</sup>, John Anderson<sup>8,9</sup>, Adam Shlien<sup>10</sup>, Anna L Godfrey<sup>4</sup>, Matthew J Murray<sup>4,11#</sup>, Sam Behjati<sup>1,4,12#‡</sup>

<sup>1</sup>Wellcome Sanger Institute, Hinxton, CB10 1SA, UK.

<sup>2</sup>Department of Haematology, University College London Hospital, London, UK.

<sup>3</sup>Department of Haematology, University College London Cancer Institute, London, UK.

<sup>4</sup>Cambridge University Hospitals NHS Foundation Trust, Cambridge, CB2 0QQ, UK.

<sup>5</sup>Department of Haematology, University of Cambridge, Cambridge, CB2 0QQ, UK.

<sup>6</sup>Cambridge Stem Cell Institute, Cambridge, Cambridgeshire, UK CB2 2XY

<sup>7</sup>Department of Medical Genetics, National Institute for Health Research Cambridge Biomedical Research Centre, University of Cambridge, Cambridge, CB2 0QQ, UK.

<sup>8</sup>UCL Great Ormond Street Institute of Child Health, London, WC1N 1EH, UK.

<sup>9</sup>Great Ormond Street Hospital for Children NHS Foundation Trust, London, WC1N 3JH, UK.

<sup>10</sup>The Hospital for Sick Children, Toronto, Ontario, Canada.

<sup>11</sup>Department of Pathology, University of Cambridge, Cambridge, CB2 1QP, UK.

<sup>12</sup>Department of Paediatrics, University of Cambridge, Cambridge, CB2 0QQ, UK.

\*These authors contributed equally

#Co-directing

‡Corresponding author

## **Contents**

### **Page**

|                                                                                       |    |
|---------------------------------------------------------------------------------------|----|
| <b>Supplementary Methods</b>                                                          | 3  |
| 1. Samples and ethical approval                                                       | 3  |
| 2. Library preparation and sequencing                                                 | 3  |
| 2.1 Whole genome sequencing                                                           | 3  |
| 2.2 Targeted sequencing                                                               | 3  |
| 2.3 Sequencing data deposition                                                        | 3  |
| 3. Variant calling                                                                    |    |
| 3.1 Variant calling from whole genome sequences                                       | 3  |
| 3.2 Variant calling from targeted sequencing data                                     | 5  |
| 3.3 Annotation of candidate driver mutations                                          | 5  |
| 4. Mutational signatures analysis                                                     | 6  |
| 5. Code availability                                                                  | 7  |
| <br>                                                                                  |    |
| <b>Supplementary Figures</b>                                                          |    |
| Supplementary Figure 1. Mutation burden in <i>de novo</i> pediatric AML and TMN cases | 8  |
| Supplementary Figure 2. Doublet-base substitution mutational profiles in t-MN genomes | 9  |
| Supplementary Figure 3. Structural variant profiles of t-MN genomes                   | 10 |
| Supplementary Figure 4. Exclusion of sites with consistently low or high coverage     | 11 |
| <br>                                                                                  |    |
| <b>Supplementary Tables</b>                                                           |    |
| Table S1. Overview of study cohort and sequencing coverage                            | 12 |
| Table S2. Genes used for the design of RNA baits                                      | 13 |
| Table S3. Rearrangements in t-MN genomes                                              | 17 |
| <br>                                                                                  |    |
| <b>Supplementary References</b>                                                       | 18 |

## **Supplemental methods**

### **1. Samples and ethical approval**

All human material was obtained from participants in the study “Investigating how childhood tumors and congenital disease develop” (NHS National Research Ethics Service reference 16/EE/0394). Written informed consent for research, including comprehensive genetic analysis, was obtained from patients' guardians in accordance with the Declaration of Helsinki and the study protocols approved by the relevant ethics committees. Data on demographic and diagnostic features (including age, previous cancer treatment, cytogenetics and hematological indices) were clinically available at the time of patient recruitment. Genomic DNA was extracted from peripheral blood, bone marrow mononuclear cells or mobilised peripheral blood mononuclear cells, and DNA integrity was verified by visualization on a 0.8% agarose gel.

### **2. Library preparation and sequencing**

#### **2.1 Whole genome sequencing**

Short insert (500bp) genomic libraries were constructed and 150 base pair paired-end sequencing clusters were generated on the Illumina HiSeq X Ten or NovaSeq 6000 platform according to Illumina no-PCR library protocols. An overview of samples is shown in **Table S1**.

#### **2.2 Targeted sequencing**

We designed a custom cRNA bait set (SureSelect, Agilent, UK, ELID ID: 3129591) complementary to all coding exons of 95 genes recurrently mutated in clonal hematopoiesis and hematological cancers, including the genes most frequently implicated in paediatric myeloid neoplasms (**Table S2**). Genomic DNA was sheared using the Covaris M220. Equimolar pools of 10 libraries were prepared and sequenced on the Illumina HiSeq 2000 using 75 base paired-end sequencing as per Illumina and Agilent SureSelect protocols.

#### **2.3 Sequencing data deposition**

Targeted and whole genome sequencing data are deposited at the European Genome Phenome Archive (EGA) under accessions EGAD00001006423 and EGAD00001006424 (<https://www.ebi.ac.uk/ega>).

### **3. Variant calling**

#### **3.1 Variant calling from whole genome sequences**

Whole genome sequences were mapped to the GRCh37d5 reference genome using the Burroughs-Wheeler Aligner (BWA-mem).<sup>1</sup>

Single-nucleotide variants (SNVs) were called using an extensively validated in-house version of Cancer Variants through Expectation Maximization (CaVEMan, 1.11.2)<sup>2,3</sup> against an *in silico* unmatched normal based on the reference genome. CaVEMan compares sequencing reads between study and nominated normal samples and uses a naïve Bayesian model and expectation-maximization approach to calculate the probability of a somatic variant at each

base (<https://github.com/cancerit/CaVEMan>). Beyond the standard post-processing filters of CaVEMan, we removed variants resulting from artifactual mapping by setting the median alignment score of reads supporting a mutation as greater than or equal to 140 (ASMD $\geq$ 140) and requiring that fewer than half of the reads were clipped (CLPM=0). Across all samples from one patient and, where applicable, their parents, we re-genotyped the SNVs and indels using a cut-off for read mapping quality (30) and base quality (25).

Small insertions and deletions (indels) were identified using an in-house version of Pindel (v2.2.5; <https://github.com/cancerit/cgpPindel>).<sup>4</sup>

Germline and somatic point mutations were differentiated based on a one-sided exact binomial test. For this test, the null hypothesis is that the number of reads supporting the variants across copy number normal samples is drawn from a binomial with  $p=0.5$  ( $p=0.95$  for copy number equal to one), and the alternative hypothesis drawn from a distribution with  $p<0.5$  (or  $p<0.95$ ). Resulting p-values were corrected for multiple testing with the Benjamini-Hochberg method<sup>3</sup> and a cut-off was set at  $q < 10^{-5}$  to minimize false positives.

Putative variants were also removed if they were present in a region of the genome with a consistently low or high coverage across all copy number-neutral samples from the same patient. This amounted to a mean coverage of between 50 and 110 for Patients 1 (PD31013) and 2 (PD42747), and between 50 and 150 for Patient 3 (PD34954) (**Figure S2**).

When an SNV in the t-MDS or t-AML clone was shared with blood or bone marrow samples, we distinguished true sharing of somatic variants from noise using a beta-binomial model of a site-specific error rate as previously described.<sup>5</sup> For this, we constructed an unmatched normal panel that was specific to the sequencing platform used (i.e. Illumina HiSeq X Ten or NovaSeq 6000). The resulting probabilities were again corrected for multiple testing using the Benjamini-Hochberg method. All shared SNVs were further visually inspected using the genome browser, Jbrowse.<sup>5</sup>

Copy number variants (CNVs) were called using the ASCAT (v4.1.2; <https://github.com/cancerit/ascatNgs>)<sup>6</sup> and Battenberg (v3.3.0; <https://github.com/cancerit/cgpBattenberg>)<sup>7</sup> algorithms. In addition, for Patient 1 (PD31013), the availability of parental whole genome sequences allowed for full phasing of the copy number variants and identification of the specific parental allele that was affected by each chromosomal abnormality.

For Patient 1, we formally quantified the sensitivity of Battenberg to determine the smallest clone size for which the algorithm is able to detect del(7q) or monosomy 7 given our sequencing depth and information from parental DNA (and hence complete phasing). We simulated allele counts for informative SNPs within the 1000Genomes single nucleotide polymorphism (SNP) locations in Patient 1 (PD31013), which amounted to 1,654,457 SNPs across her 22 autosomes. Allele counts were derived from a binomial distribution (with  $p=0.5$ ) given a Poisson distribution of coverage (N):

$$\text{allele counts} \sim \text{Bin}(n \sim \text{Pois}(N), p = 0.5)$$

We introduced a del(7q) or monosomy 7 to assess the sensitivity for a range of clone sizes (s). The paternal counts (the allele that retained a copy) were simulated as follows:

$$\text{allele counts} \sim \text{Bin}(n \sim \text{Pois}(N/(1 - \frac{s}{2})), p = 0.5 * (1 - \frac{s}{2}))$$

The maternal counts followed as the difference between the coverage and the paternal counts. These allele counts were then fed into the standard Battenberg pipeline (without the statistical phasing implemented in the base algorithm). We used N=(25, 50, 100) and s=(0, 0.001, 0.002, 0.005, 0.01, 0.015, 0.02, 0.025, 0.03, 0.035, 0.04, 0.045, 0.05, 0.055, 0.06, 0.065, 0.07, 0.075, 0.08, 0.085, 0.09, 0.095, 0.1) as our coverage and clone size range, respectively. At the relevant coverage, the minimum clone size at which del(7q) or monosomy 7 was reliably detectable amounted to 4%.

Structural variants (SVs) were called using BRASS (v6.1.2; <https://github.com/cancerit/BRASS>)<sup>8</sup> and SVs were retained if having a paired end read support of at least 5 or where reconstruction of the breakpoint via assembly was possible (see **Table S3**).

All filtered SNVs (**Table S4** and **Table S5**) will be made in excel format available on github along with relevant code.

### 3.2 Variant calling from targeted sequencing data

Targeted sequencing reads were aligned to the reference genome (GRCh37d5) using the short read Burrows-Wheeler aligner (BWA-ALN).<sup>8</sup> Unmapped reads, PCR duplicates and reads mapping to regions outside the target regions (merged exonic regions + 10bp either side of each exon) were excluded from analysis. Sequencing depth at each base was assessed using Bedtools coverage v2.24.0.<sup>9</sup>

Somatic single nucleotide variants (SNVs) were called using Shearwater, an algorithm developed for detecting subclonal mutations in deep sequencing experiments (<https://github.com/gerstung-lab/deepSNV> v1.21.5)<sup>10-12</sup> considering only reads with minimum nucleotide and mapping quality of 25 and 40, respectively. This algorithm models the error rate at individual loci using information from multiple unrelated samples.

To seek subclonal copy number variants in targeted sequencing data, we applied FACETS (Fraction and Allele-Specific Copy Number Estimates from Tumor Sequencing), an allele-specific copy number analysis (ASCN) method.<sup>13</sup>

### 3.3 Annotation of candidate driver mutations

Substitutions and indels were annotated according to ENSEMBL version 58 using VAGrENT (<http://cancerit.github.io/VAGrENT/>)<sup>14</sup> for transcript and protein effects.

To identify potential driver events, we considered variants presenting in established cancer genes (Tate et al., 2019).<sup>15</sup> Tumour suppressor coding variants were considered if they were

annotated as functionally deleterious by VAGrENT, or alternatively if they were disruptive rearrangement breakpoints or homozygous deletions. Additionally, homozygous deletions were required to be focal (<1 Mb in size) or constitute a known contiguous gene syndrome implicated in t-MN.<sup>16</sup> Mutations in oncogenes were considered driver events if they were located at previously reported canonical hot spots (point mutations) or amplified the intact gene. Amplifications also had to be focal (<1 Mb) and increase the copy number of oncogenes to a minimum of 5 copies.

To identify potential cancer predisposition germline variants, all non-somatic variants were screened against the ClinVar database<sup>17</sup> and Human Gene Mutation Database (HGMD).<sup>18</sup>

#### 4. Mutational signature analysis

We fitted reference mutational signatures<sup>19</sup> to 96 trinucleotide mutation count data using the SigFit package<sup>20</sup>.

We assigned the probability of a certain mutation arising from certain signature as the weighted fraction of the product of signature contribution and mutational probability for that signature:

$$P_{C[C>T]C,A} = \frac{C_A P_{C[C>T]C,A}}{\sum_i C_i P_{C[C>T]C,i}}$$

In other words, the odds of signature A causing a C[C>T]C mutation is the product of its contribution ( $C_A$ ) to the sample multiplied by the probability that signature A generates a C[C>T]C change. This is normalised by the sum of these products for all signatures in the sample of interest. For example, the *PTPN11* G503E mutation in the t-MN of PD31013 is a C[C>T]C change, so given the contribution of signatures, the probability breakdown is the following:

| Signature | Contribution | P of C[C>T]C | Normalised probability | Etiology                                                           |
|-----------|--------------|--------------|------------------------|--------------------------------------------------------------------|
| SBS1      | 0.023        | 0.0003       | <10 <sup>-4</sup>      | Spontaneous deamination of 5-methylcytosine (clock-like signature) |
| SBS5      | 0.058        | 0.019        | 0.01                   | Unknown (clock-like signature)                                     |
| SBS18     | 0.039        | 0.007        | 0.003                  | Oxidative stress                                                   |
| SBS31     | 0.370        | 0.164        | 0.58                   | Platinum chemotherapy                                              |
| SBS35     | 0.510        | 0.083        | 0.41                   | Platinum chemotherapy                                              |

Hence, there is a 99% probability of the *PTPN11* G503E mutation arising due to platinum-induced mutagenesis.

The *SETBP1* D868G arose long after cisplatin and carboplatin treatment had been completed and only has a 66% probability of arising due to platinum-associated signatures:

| Signature | Contribution | P of C[T>C]G | Normalised probability | Etiology                                                           |
|-----------|--------------|--------------|------------------------|--------------------------------------------------------------------|
| SBS1      | 0.023        | 0.00036      | 0.0022                 | Spontaneous deamination of 5-methylcytosine (clock-like signature) |
| SBS5      | 0.058        | 0.021        | 0.32                   | Unknown (clock-like signature)                                     |
| SBS18     | 0.039        | 0.0016       | 0.017                  | Oxidative stress                                                   |
| SBS31     | 0.370        | 0.0045       | 0.44                   | Platinum chemotherapy                                              |
| SBS35     | 0.510        | 0.0016       | 0.22                   | Platinum chemotherapy                                              |

Full signature extraction results for *de novo* germline mutations and blood, bone marrow and tumor mutations will be deposited on github in excel format (**Table S6** and **Table S7**).

### 5. Code availability

The scripts containing bespoke code for filtering, analysis and visualization described above is available from GitHub at [https://github.com/TimCoorens/Paed\\_CH\\_chemo](https://github.com/TimCoorens/Paed_CH_chemo)

## Supplemental Figures

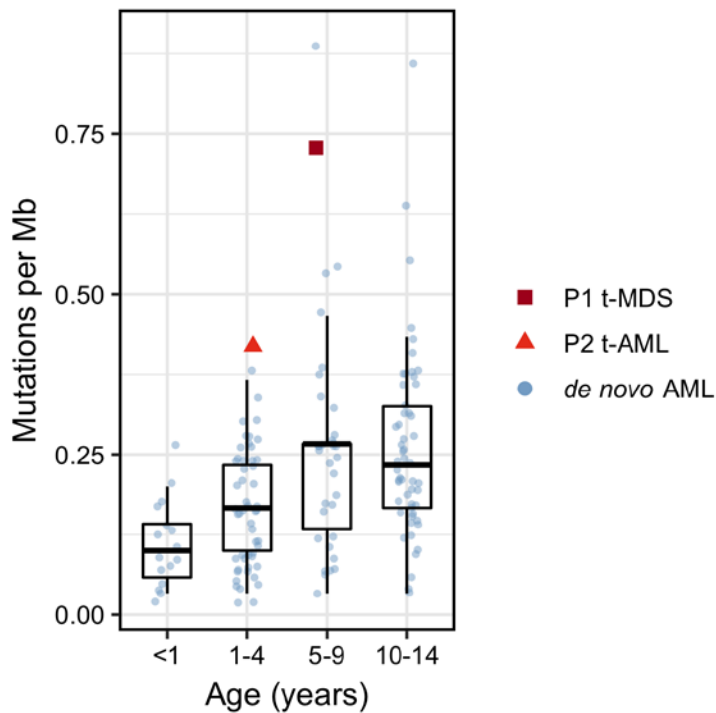

### Supplemental Figure 1. Mutation burden in *de novo* pediatric AML and TMN cases

Point mutation burden per megabase of genome is indicated on the y-axis and patient age in years on the x-axis. The red square and orange triangle indicate the mutation burdens of Patient 1's t-MDS and Patient 2's t-AML, respectively. Mutation counts for individual *de novo* pediatric AML samples from published data<sup>21</sup> are represented by blue dots. Box plot centres, hinges and whiskers represent the median, first and third quartiles and 1.5×interquartile range, respectively. AML, acute myeloid leukemia; Mb, megabase; P1, Patient 1; P2, Patient 2; t-MDS, therapy-related myelodysplastic syndrome; t-AML, therapy-related acute myeloid leukemia.



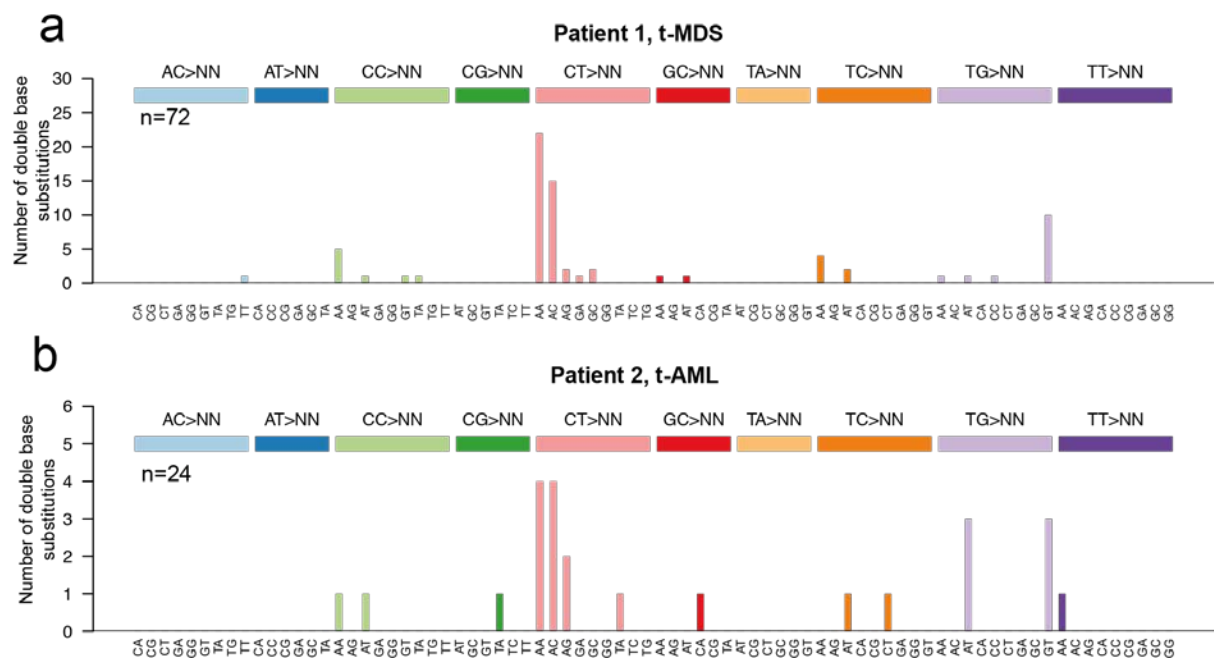

**Supplemental Figure 2. Doublet-base substitution mutational profiles in TMN genomes.** The x-axis shows the 78 classes of doublet-base substitutions (DBS). The y-axis shows the number of DBS in each class. The total number of DBS per genome is indicated at the upper left of each plot. Panel A shows the DBS profile in Patient 1’s t-MDS. Panel B shows the DBS profile of Patient 2’s t-AML. In both genomes, the doublet-base substitutions are primarily accounted for by doublet-base substitution signature 5 (DBS5), which has been linked to platinum chemotherapy exposure. t-MN, therapy-related myeloid neoplasm; t-MDS, therapy-related myelodysplastic syndrome; t-AML, therapy-related acute myeloid leukemia.

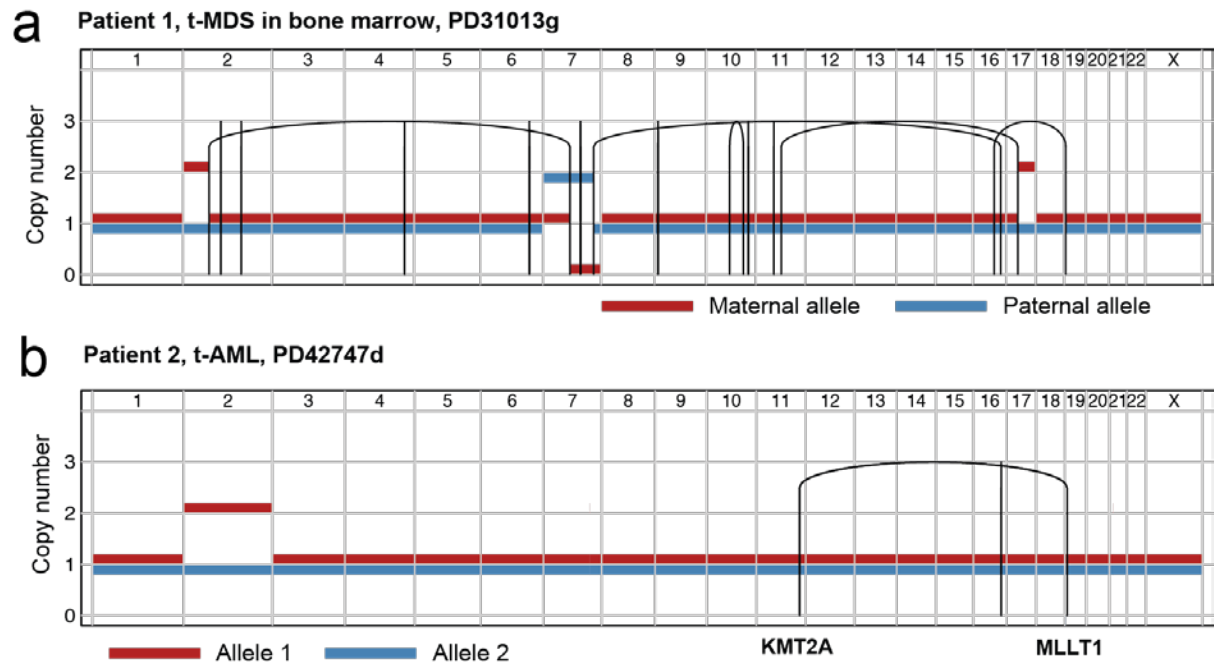

**Supplemental Figure 3. Structural variant profiles of TMN genomes.**

Allele-specific copy number profiles and chromosomal rearrangements are shown with genomic position on the x-axis and absolute copy number on the y-axis. Panel A shows the structural variant profile for Patient 1's t-MDS, with maternal and paternal alleles indicated in red and blue, respectively. Panel B shows the structural variant profile of Patient 2's t-AML, with the *KMT2A-MLL1* balanced translocation annotated. TMN, therapy-related myeloid neoplasm; t-MDS, therapy-related myelodysplastic syndrome; t-AML, therapy-related acute myeloid leukemia.

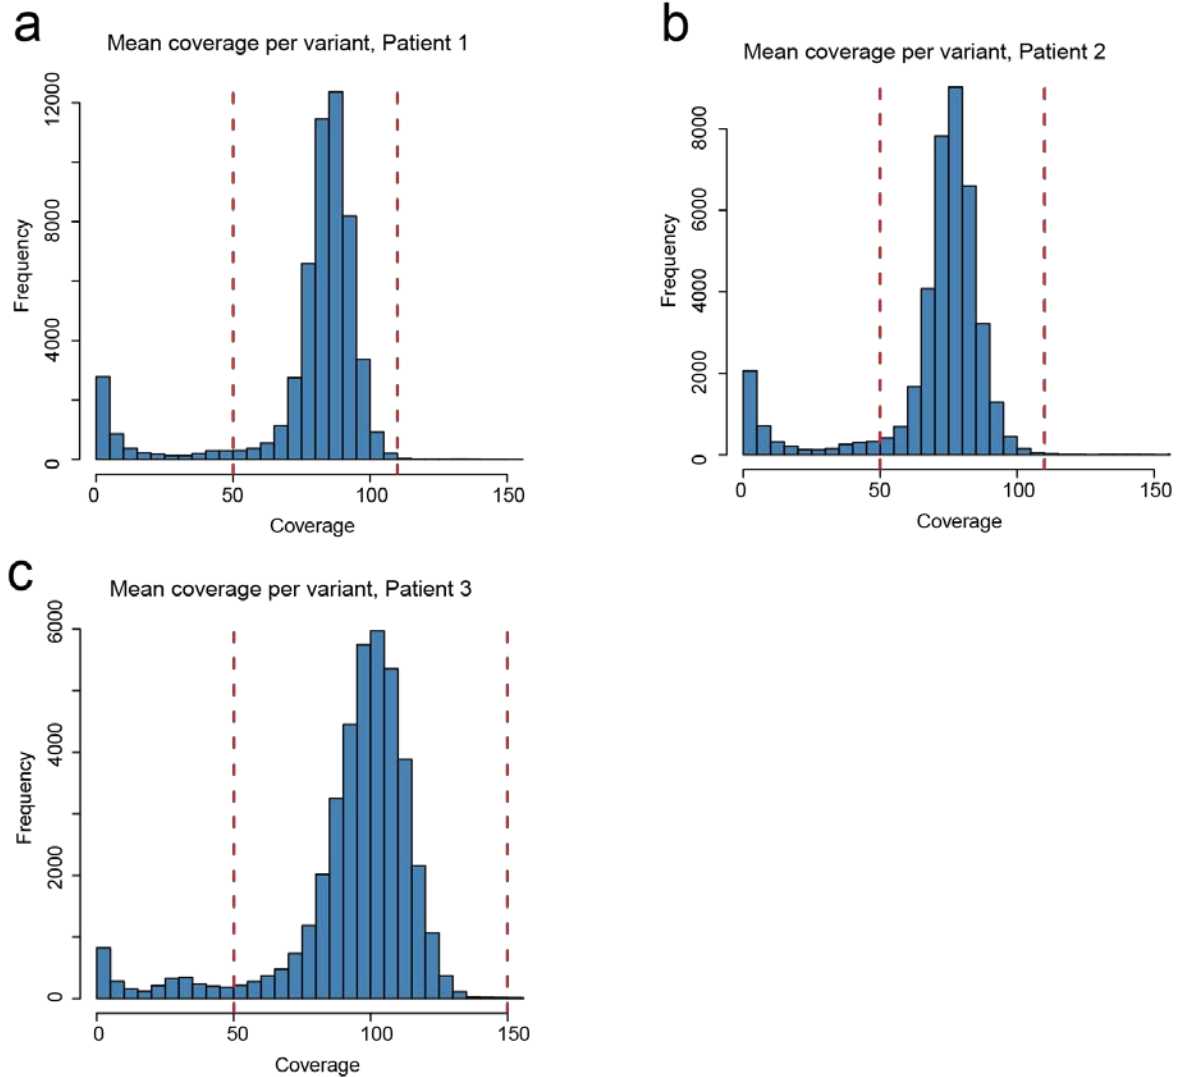

**Supplemental Figure 4. Exclusion of sites with consistently low or high coverage.**

The x-axis shows the whole genome sequencing coverage and the y-axis shows the number of point mutations. Panel A shows the distribution of point mutations according to whole genome sequencing coverage in copy number normal samples from Patient 1 (PD31013b, PD31013d, PD31013h). Panel B shows the distribution of point mutations according to whole genome sequencing coverage in copy number normal samples from Patient 2 (PD42747a, PD42747c). Panel C shows the distribution of point mutations according to whole genome sequencing coverage in the copy number normal sample from Patient 3 (PD31012b). The variants between the vertical red lines intersecting the x-axis at 50 and 110 (Patients 1 and 2) or 50 and 150 (Patient 3) demarcate the mutations included in downstream analysis. Variants at positions with coverage outside of these bounds were excluded due to enrichment for mapping errors.

## Supplementary Tables

**Table S1: Overview of study cohort**

| PatientID | Cancer Diagnosis           | Germline Cancer Predisposition | Blood Samples                      | Tumor Samples         | Bone Marrow Samples                             | Normal Renal Tissue Samples        | Parental Samples      | Sibling ID |
|-----------|----------------------------|--------------------------------|------------------------------------|-----------------------|-------------------------------------------------|------------------------------------|-----------------------|------------|
| PD34276   | High-risk neuroblastoma*   |                                | PD34276b                           |                       |                                                 |                                    | PD34957b;<br>PD34958b | PD34277b   |
| PD34954   | High-risk neuroblastoma*   | PHOX2B mutation                | PD34954b                           | PD34954a;<br>PD34954c |                                                 |                                    | PD34952b;<br>PD34953b | -          |
| PD36156   | Osteosarcoma*              | RECQL4 mutation                | PD36156b                           | PD36156a              |                                                 |                                    | PD36157b;<br>PD36158b | -          |
| PD36159   | Wilms tumor                |                                | PD36159b                           | PD36159c              |                                                 | PD36159g;<br>PD36159h              | PD36160b;<br>PD36161b | -          |
| PD36165   | Wilms tumor                | Overgrowth syndrome            | PD36165b                           | PD36165a              |                                                 | PD36165f                           | PD36166b;<br>PD36167b | -          |
| PD36812   | High-risk neuroblastoma*   | CHEK2, SMARCA4 mutations       | PD36812b;<br>PD36812b2             | PD36812a              |                                                 |                                    | PD34955b;<br>PD34956b | -          |
| PD37272   | Wilms tumor                |                                | PD37272g                           | PD37272a              |                                                 | PD37272b;<br>PD37272c;<br>PD37272d | PD37286b;<br>PD37287b | -          |
| PD37276   | Wilms tumor                |                                | PD37276g                           | PD37276a              |                                                 | PD37276b;<br>PD37276c              | PD37288b;<br>PD37289b | -          |
| PD40306   | Infantile fibrosarcoma     |                                | PD40306b                           | PD40306a              |                                                 |                                    | PD40307b;<br>PD40308b | -          |
| PD40309   | Unclassifiable renal tumor |                                | PD40309b                           | PD40309a              |                                                 | PD40309d                           | PD40310b;<br>PD40311b | -          |
| PD40312   | Osteosarcoma*              |                                | PD40312b;<br>PD40312n              | PD40312e              |                                                 |                                    | PD40313b;<br>PD40314b | -          |
| PD40641   | Wilms tumor                | Germline H19 hypermethylation  | PD40641b                           |                       |                                                 | PD40641d;<br>PD40641e              | PD40642b;<br>PD40643b | -          |
| PD40735   | Wilms tumor                |                                | PD40735k;<br>PD40735m              | PD40735a              |                                                 | PD40735b;<br>PD40735h              | PD40736b;<br>PD40737b | -          |
| PD40738   | Wilms tumor                |                                | PD40738b;<br>PD40738j              | PD40738a              |                                                 | PD40738g                           | PD41065b;<br>PD41066b | -          |
| PD42181   | Ewing sarcoma              |                                | PD42181b                           | PD42181a              |                                                 |                                    | PD41848b;<br>PD41847b | -          |
| PD46693   | High-risk neuroblastoma*   |                                | PD46693b                           | PD46693a              |                                                 |                                    | PD46694a;<br>PD46695a | -          |
| PD46692   | Rhabdomyosarcoma           |                                | PD46692b                           | PD46692a              |                                                 |                                    | PD46697b;<br>PD46698b | -          |
| PD31013   | High-risk neuroblastoma*   | BARD1 mutation                 | PD31013b;<br>PD31013c;<br>PD31013h | PD31013a              | PD31013d;<br>PD31013e;<br>PD31013f;<br>PD31013g |                                    | PD34278b;<br>PD34279b | PD31012    |
| PD31012   | Low-risk neuroblastoma*    | BARD1 mutation                 | PD31012b                           | PD31012c              |                                                 |                                    | PD34278b;<br>PD34279b | PD31013    |
| PD42747   | High-risk neuroblastoma*   |                                | PD42747b;<br>PD42747c              |                       | PD42747d                                        |                                    |                       |            |

\* in the Cancer Diagnosis column indicate that samples were taken after platinum agent treatment

**Table S2: Genes used for the design of RNA baits**

| TargetID        | Interval                  | Regions | Size  |
|-----------------|---------------------------|---------|-------|
| <i>ARID1A</i>   | chr1:27022885-27107257    | 21      | 7364  |
| <i>ASXL1</i>    | chr20:30946569-31025151   | 17      | 5060  |
| <i>ATM</i>      | chr11:108098342-108236245 | 62      | 10411 |
| <i>ATP6AP1</i>  | chrX:153657029-153664247  | 10      | 1730  |
| <i>ATP6V1B2</i> | chr8:20054908-20082849    | 16      | 1980  |
| <i>B2M</i>      | chr15:45003735-45008550   | 3       | 443   |
| <i>BCL10</i>    | chr1:85733300-85742045    | 3       | 762   |
| <i>BCL2</i>     | chr18:60795848-60985909   | 2       | 793   |
| <i>BCL6</i>     | chr3:187440236-187451491  | 8       | 2281  |
| <i>BCOR</i>     | chrX:39909159-39937192    | 15      | 5648  |
| <i>BCORL1</i>   | chrX:129139198-129190121  | 14      | 5690  |
| <i>BRAF</i>     | chr7:140426284-140624513  | 21      | 2799  |
| <i>CALR</i>     | chr19:13049484-13054805   | 10      | 1494  |
| <i>CARD11</i>   | chr7:2946262-2998150      | 24      | 3945  |
| <i>CBL</i>      | chr11:119077118-119170501 | 16      | 3041  |
| <i>CCND3</i>    | chr6:41903579-41909397    | 6       | 1151  |
| <i>CD58</i>     | chr1:117057425-117113604  | 7       | 922   |
| <i>CD79B</i>    | chr17:62006576-62009631   | 6       | 813   |
| <i>CDKN2A</i>   | chr9:21968198-21994463    | 6       | 1248  |
| <i>CEBPA</i>    | chr19:33792234-33793435   | 1       | 1202  |
| <i>CREBBP</i>   | chr16:3777709-3929927     | 31      | 7988  |
| <i>CSF1R</i>    | chr5:149433622-149466000  | 22      | 3443  |

|                 |                          |    |      |
|-----------------|--------------------------|----|------|
| <i>CSF3R</i>    | chr1:36931687-36945107   | 16 | 3018 |
| <i>CUX1</i>     | chr7:101459301-101926392 | 34 | 6113 |
| <i>DNMT3A</i>   | chr2:25457138-25536863   | 25 | 3388 |
| <i>EBF1</i>     | chr5:158126109-158526496 | 16 | 2099 |
| <i>EP300</i>    | chr22:41488999-41574970  | 31 | 7865 |
| <i>ETNK1</i>    | chr12:22778088-22837898  | 11 | 1750 |
| <i>ETV6</i>     | chr12:11803052-12044545  | 10 | 1643 |
| <i>EZH2</i>     | chr7:148504728-148544400 | 21 | 2876 |
| <i>FBXW7</i>    | chr4:153244023-153332965 | 14 | 2898 |
| <i>FLT3</i>     | chr13:28578179-28674657  | 25 | 3504 |
| <i>FOXO1</i>    | chr13:41133650-41240359  | 2  | 2008 |
| <i>GATA2</i>    | chr3:128199852-128205884 | 5  | 1543 |
| <i>GNA13</i>    | chr17:63010365-63052721  | 4  | 1214 |
| <i>GNAS</i>     | chr20:57415152-57485894  | 17 | 4436 |
| <i>GNB1</i>     | chr1:1718760-1756902     | 9  | 1217 |
| <i>H3F3A</i>    | chr1:226252043-226259190 | 3  | 561  |
| <i>HIST1H1B</i> | chr6:27834617-27835317   | 1  | 701  |
| <i>HIST1H1C</i> | chr6:26056005-26056666   | 1  | 662  |
| <i>HIST1H1D</i> | chr6:26234486-26235171   | 1  | 686  |
| <i>HIST1H1E</i> | chr6:26156609-26157288   | 1  | 680  |
| <i>IDH1</i>     | chr2:209101793-209116285 | 8  | 1408 |
| <i>IDH2</i>     | chr15:90627488-90645632  | 11 | 1579 |
| <i>IKZF3</i>    | chr17:37922033-38020389  | 9  | 1793 |
| <i>IL7R</i>     | chr5:35857070-35876598   | 8  | 1716 |
| <i>IRF8</i>     | chr16:85936612-85954898  | 8  | 1466 |

|               |                          |    |       |
|---------------|--------------------------|----|-------|
| <i>JAK2</i>   | chr9:5021978-5126801     | 23 | 3859  |
| <i>KDM6A</i>  | chrX:44732788-44970666   | 31 | 5090  |
| <i>KIT</i>    | chr4:55524172-55604733   | 21 | 3351  |
| <i>KMT2C</i>  | chr7:151833907-152132881 | 60 | 16122 |
| <i>KMT2D</i>  | chr12:49415553-49449117  | 55 | 17762 |
| <i>KRAS</i>   | chr12:25362719-25398328  | 6  | 828   |
| <i>MBD1</i>   | chr18:47793948-47807596  | 20 | 2712  |
| <i>MEF2B</i>  | chr19:19256493-19267955  | 9  | 1565  |
| <i>MPL</i>    | chr1:43803510-43818453   | 12 | 2233  |
| <i>MYC</i>    | chr8:128748830-128753214 | 3  | 1425  |
| <i>MYD88</i>  | chr3:38180143-38182787   | 5  | 1054  |
| <i>NF1</i>    | chr17:29422216-29705959  | 63 | 10271 |
| <i>NOTCH1</i> | chr9:139390513-139440248 | 34 | 8348  |
| <i>NOTCH2</i> | chr1:120457919-120612030 | 35 | 8243  |
| <i>NPM1</i>   | chr5:170814943-170837579 | 12 | 1134  |
| <i>NRAS</i>   | chr1:115251146-115258791 | 4  | 650   |
| <i>PAX5</i>   | chr9:36840516-37034038   | 11 | 1484  |
| <i>PDGFRA</i> | chr4:55106210-55161449   | 24 | 3930  |
| <i>PHF6</i>   | chrX:133511638-133559370 | 9  | 1387  |
| <i>PIM1</i>   | chr6:37138069-37141877   | 6  | 1335  |
| <i>POT1</i>   | chr7:124462572-124537237 | 17 | 2444  |
| <i>POU2F2</i> | chr19:42595399-42636573  | 16 | 2803  |
| <i>PPM1D</i>  | chr17:58677766-58740923  | 8  | 2054  |
| <i>PRDM1</i>  | chr6:106534419-106555371 | 9  | 2715  |
| <i>PTEN</i>   | chr10:89623697-89725239  | 9  | 1912  |

|                 |                           |    |      |
|-----------------|---------------------------|----|------|
| <i>PTPN11</i>   | chr12:112856906-112942578 | 16 | 2142 |
| <i>RAD21</i>    | chr8:117859729-117878978  | 13 | 2156 |
| <i>RRAGC</i>    | chr1:39305215-39325328    | 7  | 1340 |
| <i>RUNX1</i>    | chr21:36164422-36421206   | 11 | 1804 |
| <i>SETBP1</i>   | chr18:42281302-42643673   | 6  | 5100 |
| <i>SETD2</i>    | chr3:47058573-47205424    | 23 | 8200 |
| <i>SF3B1</i>    | chr2:198257017-198299733  | 27 | 4585 |
| <i>SMC3</i>     | chr10:112327565-112364070 | 29 | 4234 |
| <i>SOCS1</i>    | chr16:11348690-11349345   | 1  | 656  |
| <i>SRSF2</i>    | chr17:74732233-74733252   | 2  | 706  |
| <i>STAG2</i>    | chrX:123156468-123234457  | 34 | 4541 |
| <i>STAT3</i>    | chr17:40467753-40526091   | 24 | 2799 |
| <i>STAT6</i>    | chr12:57490345-57502071   | 22 | 3038 |
| <i>TCF3</i>     | chr19:1611696-1650257     | 18 | 2813 |
| <i>TET2</i>     | chr4:106111617-106197686  | 10 | 6365 |
| <i>TNFAIP3</i>  | chr6:138192355-138202466  | 8  | 2533 |
| <i>TNFRSF14</i> | chr1:2488094-2494722      | 9  | 1063 |
| <i>TP53</i>     | chr17:7565247-7579922     | 14 | 1658 |
| <i>U2AF1</i>    | chr21:44513202-44527614   | 9  | 970  |
| <i>WT1</i>      | chr11:32410594-32456901   | 11 | 1788 |
| <i>XPO1</i>     | chr2:61705945-61761042    | 24 | 3717 |
| <i>ZEB1</i>     | chr10:31608154-31816202   | 14 | 4047 |
| <i>ZRSR2</i>    | chrX:15808609-15841375    | 12 | 1930 |



**Table S3: Rearrangements in TMN genomes**

| Sample   | Chr1 | Start1    | End1      | Chr2 | Start2    | End2      | Str1 | Str2 | Class              |
|----------|------|-----------|-----------|------|-----------|-----------|------|------|--------------------|
| PD31013g | 10   | 64274893  | 64274894  | 10   | 101807999 | 101808000 | +    | +    | deletion           |
| PD31013g | 10   | 115352535 | 115352539 | 10   | 115358137 | 115358141 | +    | +    | deletion           |
| PD31013g | 11   | 49470897  | 49470898  | 11   | 49501833  | 49501834  | -    | -    | tandem-duplication |
| PD31013g | 11   | 69668285  | 69668286  | 17   | 32592699  | 32592700  | +    | +    | translocation      |
| PD31013g | 16   | 58389087  | 58389088  | 19   | 4477792   | 4477793   | -    | +    | translocation      |
| PD31013g | 2    | 71397155  | 71397156  | 7    | 74049196  | 74049197  | +    | -    | translocation      |
| PD31013g | 2    | 103606305 | 103606307 | 2    | 103690218 | 103690220 | -    | -    | tandem-duplication |
| PD31013g | 2    | 159499285 | 159499291 | 2    | 159521109 | 159521115 | -    | -    | tandem-duplication |
| PD31013g | 4    | 165182548 | 165182550 | 4    | 165229311 | 165229313 | +    | +    | deletion           |
| PD31013g | 6    | 134271315 | 134271317 | 6    | 134448413 | 134448415 | -    | -    | tandem-duplication |
| PD31013g | 7    | 102606970 | 102606973 | 7    | 102663898 | 102663901 | +    | +    | deletion           |
| PD31013g | 7    | 102720030 | 102720031 | 7    | 102728596 | 102728597 | +    | +    | deletion           |
| PD31013g | 7    | 139004681 | 139004682 | 16   | 76154792  | 76154793  | -    | -    | translocation      |
| PD31013g | 9    | 8912316   | 8912320   | 9    | 10088906  | 10088910  | +    | +    | deletion           |
| PD31013c | 2    | 71397176  | 71397177  | 7    | 74049164  | 74049165  | +    | -    | translocation      |
| PD42747d | 11   | 50676665  | 50676666  | 11   | 50676464  | 50676465  | +    | +    | deletion           |
| PD42747d | 11   | 118353359 | 118353360 | 19   | 6247186   | 6247187   | +    | -    | translocation      |
| PD42747d | 11   | 118353365 | 118353366 | 19   | 6247215   | 6247216   | -    | +    | translocation      |
| PD42747d | 16   | 75844202  | 75844217  | 16   | 75844207  | 75844222  | +    | +    | deletion           |
| PD42747d | 17   | 44223916  | 44223917  | 17   | 44224321  | 44224322  | +    | +    | deletion           |
| PD42747d | 9    | 6751209   | 6751210   | 9    | 6752054   | 6752055   | +    | +    | deletion           |

## **Supplemental References**

1. Li H, Durbin R. Fast and accurate long-read alignment with Burrows-Wheeler transform. *Bioinformatics*. 2010;26(5):589–595.
2. Stephens PJ, Tarpey PS, Davies H, et al. The landscape of cancer genes and mutational processes in breast cancer. *Nature*. 2012;486(7403):400–404.
3. Jones D, Raine KM, Davies H, et al. cgpCaVEManWrapper: Simple Execution of CaVEMan in Order to Detect Somatic Single Nucleotide Variants in NGS Data. *Curr. Protoc. Bioinformatics*. 2016;56:15.10.1–15.10.18.
4. Raine KM, Hinton J, Butler AP, et al. cgpPindel: Identifying Somatic Acquired Insertion and Deletion Events from Paired End Sequencing. *Curr. Protoc. Bioinformatics*. 2015;52:15.7.1–15.7.12.
5. Coorens THH, Treger TD, Al-Saadi R, et al. Embryonal precursors of Wilms tumor. *Science*. 2019;366(6470):1247–1251.
6. Van Loo P, Nordgard SH, Lingjærde OC, et al. Allele-specific copy number analysis of tumors. *Proc. Natl. Acad. Sci. U. S. A.* 2010;107(39):16910–16915.
7. Nik-Zainal S, Van Loo P, Wedge DC, et al. The life history of 21 breast cancers. *Cell*. 2012;149(5):994–1007.
8. Li H, Durbin R. Fast and accurate short read alignment with Burrows-Wheeler transform. *Bioinformatics*. 2009;25(14):1754–1760.
9. Quinlan AR, Hall IM. BEDTools: a flexible suite of utilities for comparing genomic features. *Bioinformatics*. 2010;26(6):841–842.
10. Gerstung M, Beisel C, Rechsteiner M, et al. Reliable detection of subclonal single-nucleotide variants in tumour cell populations. *Nat. Commun*. 2012;3:811.
11. Gerstung M, Papaemmanuil E, Campbell PJ. Subclonal variant calling with multiple samples and prior knowledge. *Bioinformatics*. 2014;30(9):1198–1204.
12. Martincorena I, Roshan A, Gerstung M, et al. Tumor evolution. High burden and pervasive positive selection of somatic mutations in normal human skin. *Science*. 2015;348(6237):880–886.
13. Shen R, Seshan VE. FACETS: allele-specific copy number and clonal heterogeneity analysis tool for high-throughput DNA sequencing. *Nucleic Acids Res*. 2016;44(16):e131.
14. Menzies A, Teague JW, Butler AP, et al. VAGrENT: Variation Annotation Generator. *Current Protocols in Bioinformatics*. 2015;52(1.):
15. Tate JG, Bamford S, Jubb HC, et al. COSMIC: the Catalogue Of Somatic Mutations In Cancer. *Nucleic Acids Res*. 2019;47(D1):D941–D947.
16. McNerney ME, Godley LA, Le Beau MM. Therapy-related myeloid neoplasms: when genetics and environment collide. *Nat. Rev. Cancer*. 2017;17(9):513–527.
17. Landrum MJ, Lee JM, Benson M, et al. ClinVar: public archive of interpretations of clinically relevant variants. *Nucleic Acids Res*. 2016;44(D1):D862–8.
18. Stenson PD, Ball EV, Mort M, et al. Human Gene Mutation Database (HGMD): 2003 update. *Hum. Mutat*. 2003;21(6):577–581.
19. Alexandrov LB, Kim J, Haradhvala NJ, et al. The repertoire of mutational signatures in human cancer. *Nature*. 2020;578(7793):94–101.
20. Gori K, Baez-Ortega A. sigfit: flexible Bayesian inference of mutational signatures. *bioRxiv*. 2018;
21. Bolouri H, Farrar JE, Triche T Jr, et al. The molecular landscape of pediatric acute myeloid leukemia reveals recurrent structural alterations and age-specific mutational interactions. *Nat. Med*. 2018;24(1):103–112.
